# Supplementary material
Source: PubMed Central journal article supplement (PMC8846394)
Supplement: aac.01431-21-s0001.pdf [file aac.01431-21-s0001.pdf]

## 1 **Supplementary text**

### 2 **Materials and methods:**

3 Construction of *gdpP* deletion mutant and its complemented strains: To create *gdpP* deletion  
4 strains, up- and down-stream regions of *gdpP* were PCR amplified with the primers *gdpP*-P1 &  
5 P2 and *gdpP*-P3 & P4, respectively. The full-length *gdpP* gene was PCR amplified using splice  
6 overlap extension PCR and was cloned into *pKORI*. The resultant plasmid was sequence  
7 confirmed and transformed to the target strains. Allelic replacement of *gdpP* was carried out as  
8 previously described (1). The deletion mutation was confirmed by PCR and through analytical  
9 sequencing.

10 To create the constitutively expressing *gdpP* in *pTX<sub>Δ</sub>*, full-length *gdpP* gene was PCR amplified  
11 from the genomic DNA of strains as mentioned in three different fragments using PCR primers  
12 *gdpP*-1 & 2, 3 & 4 and 5 & 6. The full-length *gdpP* was obtained by performing splice overlap  
13 extension PCR with the PCR fragments that were obtained in the previous step. The fragmented  
14 PCR amplification of the full-length *gdpP* was necessary to remove additional BamH1 & MluI  
15 internal cutting sites, which were the restriction enzymes used to clone the full-length *gdpP* into  
16 the constitutively expressing vector *pTX<sub>Δ</sub>*. The resultant plasmid was sequence verified for  
17 sequence accuracy of the cloned *gdpPs*.

18 *gdpPs* from the selected clinical isolates, which had missense mutation/s (**Table S4**) were  
19 amplified and cloned into the *pTX<sub>Δ</sub>* plasmid. Additional PCR primers *gdpP*-7 - *gdpP*-10 were used  
20 to clone *gdpP* of the clinical strains mentioned below to remove additional BamH1 & MluI  
21 internal cutting sites. *gdpP*-7 and *gdpP*-8 was used repair a third MluI in *gdpP* from strain  
22 10. Primer *gdpP*-9 was used for strain 5 instead of primer *gdpP*-3. Primer *gdpP*-10 was used for

23 strain 4 instead of primer *gdpP*-5. The plasmids were first transformed into RN4220 followed by  
24 transduction into SF8300  $\Delta$ *gdpP*.

25

26 Tolerance assay: Bacterial tolerance assay was carried out as previously described (2). Briefly,  $1 \times 10^6$   
27 bacteria from overnight cultures were inoculated in 10 ml TSB with the indicated drug.  
28 Bacteria were incubated at 37°C in a shaking incubator and plated at 0, 3 and 6 h for enumeration  
29 of CFUs.

30

31 Competition assay: Bacterial inoculum (SF8300<sup>tet</sup> and SF8300  $\Delta$ *gdpP* strains) was prepared by  
32 centrifugation of 10 ml bacterial culture that was grown in TSB media for 24 h followed by wash  
33 with PBS containing 10% glycerol. The bacterial pellet was re-suspended in PBS containing 10%  
34 glycerol, aliquoted in 1ml batches and stored at -80°C. Bacterial titers were determined by plating  
35 serial dilutions of bacteria from 2 different tubes of stored bacteria. For competition assay,  $2 \times 10^6$   
36 bacteria (1:1 mixture of the 2 strains mentioned above) were inoculated in 10 ml TSB. The  
37 following conditions were tested 1) No drug and 2) nafcillin treatment (4, 16 and 32  $\mu$ g/ml).  
38 Bacterial CFU were determined by plating bacteria on TSA plates at 0 and 24 h post inoculation.  
39 Enumeration of respective number of SF8300<sup>tet</sup> and SF8300  $\Delta$ *gdpP* strains were determined by  
40 replica plating the bacterial colonies onto TSA and TSA containing tetracycline (3  $\mu$ g/ml).

41

42 Western Blotting: Overnight cultures of bacteria were subcultured into 50mL flasks containing  
43 TSB such that the initial OD<sub>600</sub> of the flasks were 0.1. The flasks were cultured for 2 h and 2  $\mu$ g/ml  
44 nafcillin was added. Bacterial cells were harvested following 2 h incubation of antibiotic addition.  
45 The collected cells were washed with Phosphate Buffered Saline (PBS), resuspended in lysis

46 buffer (50mM Tris pH 7.5, 150mM NaCl, 2mM EDTA, 1mM Sodium Pyrophosphate, 1X  
47 CompleteMini protease inhibitor cocktail (Roche)) and were mechanically lysed using the  
48 FastPrep FP120 (Thermo Savant). Following centrifugation, the supernatant was collected and cell  
49 membrane fractions were isolated by performing ultracentrifugation (66000g, Sorvall WX Ultra  
50 80 Centrifuge, Thermo Fisher Scientific). After resuspending the pellet with lysis buffer, protein  
51 estimation was carried out using Pierce BCA Protein Assay kit (Thermo Fisher). Western blot  
52 assay was carried out with Rabbit polyclonal anti-PBP2a antibody (RayBiotech) at a 1:1000  
53 dilution for overnight incubation and Goat anti-Rabbit secondary antibody (Azure Biosystems)  
54 (1:10000) for 1 h.

55  
56 Bocillin assay: As previously described (3), overnight cultures of the selected *S. aureus* strains  
57 were diluted in TSB such that the OD<sub>600</sub> value was 0.1. Cells were grown at 37°C, 180 rpm until  
58 OD<sub>600</sub> of 1 after which 50 mL of the culture was collected for centrifugation at 2451 g (3500 rpm)  
59 to obtain cell pellets. The pellets were dried and resuspended in 500 µL PBS and were then  
60 mechanically lysed using the FastPrep FP120 (Thermo Savant). Following centrifugation, the  
61 supernatant was collected and cell membrane fractions were isolated by performing  
62 ultracentrifugation (66000g, Sorvall WX Ultra 80 Centrifuge, Thermo Fisher Scientific). The  
63 obtained pellets were resuspended in 100 µL PBS and protein estimation was carried out using  
64 Pierce BCA Protein Assay kit (Thermo Fisher). The membrane fraction was then incubated with  
65 10 µM Bocillin-F1 (Thermo Fisher) for 30 minutes at 35°C. The reaction was stopped by boiling  
66 with sample buffer for 10 minutes following which 20 µg of protein was loaded onto a 10% SDS-  
67 polyacrylamide gel and electrophoresis was carried out at 80V. The bands were visualized using  
68 the Typhoon 9410 imager (Amersham/GE Healthcare).

69  
70 Electron microscopy: Transmission Electron Microscopy (TEM) was carried out as described  
71 previously (4). Briefly, overnight bacterial cultures were collected and fixed with 2.5%  
72 glutaraldehyde in 0.1M sodium cacodylate buffer (Electron Microscopy Sciences). Following  
73 post-fixation with 1% osmium tetroxide reduced with 0.8% potassium ferrocyanide, the cell pellets  
74 were treated with 1% tannic acid and stained with uranyl acetate replacement (UAR). Samples  
75 were dehydrated with a graded ethanol series, followed by dehydration with acetone and embedded  
76 in Embed 812 resin. Thin sections were cut with a Leica EM UC6 ultramicrotome (Leica), and  
77 stained with 1% UAR and Reynold's lead citrate prior to viewing at 120 kV on a Tecnai BT Spirit  
78 transmission electron microscope (FEI). Digital images were acquired with a Hamamatsu side  
79 mount digital camera system (Advanced Microscopy Techniques).

80 For scanning electron microscopy, cell suspensions were adsorbed on silicon chips and fixed with  
81 2.5% glutaraldehyde in 0.1m sodium cacodylate buffer. Similar to the TEM specimen processing,  
82 the cells were post-fixed with 1% reduced osmium tetroxide and dehydrated in graded ethanol  
83 series. The specimen was dried using a critical point dryer (Bal-Tech AG), sputter coated with  
84 iridium (South Bay Technology, Inc.) and imaged on a Hitachi SU8000 scanning electron  
85 microscope (Hitachi High Technologies).

86  
87 Sequencing: Fidelity of all the mutants and plasmid constructs were validated through Sanger  
88 sequencing (Eurofins Genomics, USA).

89 **References**

- 90 1. Bae T, Schneewind O. 2006. Allelic replacement in *Staphylococcus aureus* with inducible  
91 counter-selection. *Plasmid* 55:58-63.
- 92 2. Levin-Reisman I, Ronin I, Gefen O, Braniss I, Shores N, Balaban NQ. 2017. Antibiotic  
93 tolerance facilitates the evolution of resistance. *Science* 355:826-830.
- 94 3. Hamilton SM, Alexander JAN, Choo EJ, Basuino L, da Costa TM, Severin A, Chung M,  
95 Aedo S, Strynadka NCJ, Tomasz A, Chatterjee SS, Chambers HF. 2017. High-level  
96 resistance of *Staphylococcus aureus* to  $\beta$ -lactam antibiotics mediated by Penicillin-Binding  
97 Protein 4 (PBP4). *Antimicrobial Agents and Chemotherapy* 61:e02727-16.
- 98 4. Chatterjee SS, Joo HS, Duong AC, Dieringer TD, Tan VY, Song Y, Fischer ER, Cheung  
99 GY, Li M, Otto M. 2013. Essential *Staphylococcus aureus* toxin export system. *Nat Med*  
100 19:364-7.
- 101 5. Greninger AL, Chatterjee SS, Chan LC, Hamilton SM, Chambers HF, Chiu CY. 2016.  
102 Whole-genome sequencing of Methicillin-Resistant *Staphylococcus aureus* resistant to  
103 fifth-generation cephalosporins reveals potential non-*mecA* mechanisms of resistance.  
104 *PLoS One* 11:e0149541.
- 105 6. Chan LC, Gilbert A, Basuino L, da Costa TM, Hamilton SM, Dos Santos KR, Chambers  
106 HF, Chatterjee SS. 2016. PBP4 mediates high-level resistance to new-generation  
107 cephalosporins in *Staphylococcus aureus*. *Antimicrob Agents Chemother* 60:3934-41.
- 108 7. Luong TT, Lee CY. 2007. Improved single-copy integration vectors for *Staphylococcus*  
109 *aureus*. *J Microbiol Methods* 70:186-90.
- 110 8. Argudín MA, Roisin S, Nienhaus L, Dodemont M, de Mendonca R, Nonhoff C, Deplano  
111 A, Denis O. 2018. Genetic diversity among *Staphylococcus aureus* isolates showing

112           oxacillin and/or ceftioxin resistance not linked to the presence of mec genes. Antimicrob  
113           Agents Chemother 62.  
114

115 **Supplementary tables and figures**116 **Table S1a: List of wild-type and passaged strains used in this study**

| <b>Strains</b> | <b>Notes</b>                                      | <b><i>pbp4</i> promoter</b>                                                                                | <b>PBP4</b>     | <b>GdpP</b> |
|----------------|---------------------------------------------------|------------------------------------------------------------------------------------------------------------|-----------------|-------------|
| COLnex         | <i>mecA</i> excised COLn (3)                      | -                                                                                                          | -               | -           |
| CRB            | COLnex passaged in<br>Ceftobiprole (3)            | 36bp insertion                                                                                             | E183A;<br>F241R | N182K       |
| CmTc           | COLnex passaged in<br>Ceftaroline (5)             | A>C at -399bp upstream<br>of <i>pbp4</i> start codon                                                       | T201A;<br>F241L | H443Y       |
| SF8300ex       | <i>mecA</i> and <i>blaZ</i> excised SF8300<br>(5) | -                                                                                                          | -               | -           |
| SRB            | SF8300ex passaged in<br>Ceftobiprole (5)          | -                                                                                                          | E183V;<br>F241R | T509A       |
| SRT            | SF8300ex passaged in<br>Ceftaroline (5)           | "A" deletion at -378bp<br>upstream and 11bp<br>deletion at 300bp<br>upstream of <i>pbp4</i> start<br>codon | N138K;<br>H270L | X306        |
| SF8300         | Community associated MRSA                         | -                                                                                                          | -               | -           |
| MW2            | Community associated MRSA                         | -                                                                                                          | -               | -           |
| COLn           | Hospital associated MRSA                          | -                                                                                                          | -               | -           |
| N315           | Hospital associated MRSA                          | -                                                                                                          | -               | -           |
| RN4220         | Laboratory <i>S. aureus</i> strain                | -                                                                                                          | -               | -           |

117

118 **Table S1b: List of strains created in this study**

| Strains created in this study        | Notes                                                                           |
|--------------------------------------|---------------------------------------------------------------------------------|
| SF8300 $\Delta gdpP$                 | <i>gdpP</i> deleted SF8300 strain                                               |
| SF8300ex $\Delta gdpP$               | <i>gdpP</i> deleted SF8300ex strain                                             |
| MW2 $\Delta gdpP$                    | <i>gdpP</i> deleted MW2 strain                                                  |
| COLn $\Delta gdpP$                   | <i>gdpP</i> deleted COLn strain                                                 |
| N315 $\Delta gdpP$                   | <i>gdpP</i> deleted N315 strain                                                 |
| SF8300 [E]                           | SF8300 with empty constitutively expression vector $pTX_{\Delta}$               |
| SF8300 $\Delta gdpP$ [E]             | SF8300 $\Delta gdpP$ with empty constitutively expression vector $pTX_{\Delta}$ |
| SF8300 $\Delta gdpP$ [ <i>gdpP</i> ] | SF8300 $\Delta gdpP$ with $pTX_{\Delta}$ expressing <i>gdpP</i> from SF8300     |
| MW2 [E]                              | MW2 with empty constitutively expression vector $pTX_{\Delta}$                  |
| MW2 $\Delta gdpP$ [E]                | MW2 $\Delta gdpP$ with empty constitutively expression vector $pTX_{\Delta}$    |
| MW2 $\Delta gdpP$ [ <i>gdpP</i> ]    | MW2 $\Delta gdpP$ with $pTX_{\Delta}$ expressing <i>gdpP</i> from SF8300        |
| SF8300 $\Delta gdpP$ [CRB]           | SF8300 $\Delta gdpP$ with $pTX_{\Delta}$ expressing <i>gdpP</i> from CRB        |
| SF8300 $\Delta gdpP$ [CmTc]          | SF8300 $\Delta gdpP$ with $pTX_{\Delta}$ expressing <i>gdpP</i> from CmTc       |
| SF8300 $\Delta gdpP$ [SRB]           | SF8300 $\Delta gdpP$ with $pTX_{\Delta}$ expressing <i>gdpP</i> from SRB        |
| SF8300 $\Delta gdpP$ [SRT]           | SF8300 $\Delta gdpP$ with $pTX_{\Delta}$ expressing <i>gdpP</i> from SRT        |
| SF8300 $\Delta gdpP$ [strain 1]      | SF8300 $\Delta gdpP$ with $pTX_{\Delta}$ expressing <i>gdpP</i> from strain 1   |
| SF8300 $\Delta gdpP$ [strain 2]      | SF8300 $\Delta gdpP$ with $pTX_{\Delta}$ expressing <i>gdpP</i> from strain 2   |
| SF8300 $\Delta gdpP$ [strain 3]      | SF8300 $\Delta gdpP$ with $pTX_{\Delta}$ expressing <i>gdpP</i> from strain 3   |
| SF8300 $\Delta gdpP$ [strain 4]      | SF8300 $\Delta gdpP$ with $pTX_{\Delta}$ expressing <i>gdpP</i> from strain 4   |
| SF8300 $\Delta gdpP$ [strain 5]      | SF8300 $\Delta gdpP$ with $pTX_{\Delta}$ expressing <i>gdpP</i> from strain 5   |
| SF8300 $\Delta gdpP$ [strain 6]      | SF8300 $\Delta gdpP$ with $pTX_{\Delta}$ expressing <i>gdpP</i> from strain 6   |
| SF8300 $\Delta gdpP$ [strain 7]      | SF8300 $\Delta gdpP$ with $pTX_{\Delta}$ expressing <i>gdpP</i> from strain 7   |
| SF8300 $\Delta gdpP$ [strain 8]      | SF8300 $\Delta gdpP$ with $pTX_{\Delta}$ expressing <i>gdpP</i> from strain 8   |
| SF8300 $\Delta gdpP$ [strain 9]      | SF8300 $\Delta gdpP$ with $pTX_{\Delta}$ expressing <i>gdpP</i> from strain 9   |
| SF8300 $\Delta gdpP$ [strain 10]     | SF8300 $\Delta gdpP$ with $pTX_{\Delta}$ expressing <i>gdpP</i> from strain 10  |
| SF8300 $\Delta gdpP$ [strain 11]     | SF8300 $\Delta gdpP$ with $pTX_{\Delta}$ expressing <i>gdpP</i> from strain 11  |
| SF8300 $\Delta gdpP$ [strain 12]     | SF8300 $\Delta gdpP$ with $pTX_{\Delta}$ expressing <i>gdpP</i> from strain 12  |
| SF8300 <sup>tet</sup>                | Tetracycline resistant SF8300                                                   |

119

120



121 **Table S2: List of plasmids used in this study**

| Plasmids used                     | Notes                                          |
|-----------------------------------|------------------------------------------------|
| $pTX_{\Delta}$                    | Empty plasmid for constitutive expression (6)  |
| $pTX_{\Delta} + gdpP$ [SF8300]    | Constitutively expressed $gdpP$ from SF8300    |
| $pTX_{\Delta} + gdpP$ [CRB]       | Constitutively expressed $gdpP$ from CRB       |
| $pTX_{\Delta} + gdpP$ [CmTc]      | Constitutively expressed $gdpP$ from CmTc      |
| $pTX_{\Delta} + gdpP$ [SRB]       | Constitutively expressed $gdpP$ from SRB       |
| $pTX_{\Delta} + gdpP$ (strain 1)  | Constitutively expressed $gdpP$ from strain 1  |
| $pTX_{\Delta} + gdpP$ (strain 2)  | Constitutively expressed $gdpP$ from strain 2  |
| $pTX_{\Delta} + gdpP$ (strain 3)  | Constitutively expressed $gdpP$ from strain 3  |
| $pTX_{\Delta} + gdpP$ (strain 4)  | Constitutively expressed $gdpP$ from strain 4  |
| $pTX_{\Delta} + gdpP$ (strain 5)  | Constitutively expressed $gdpP$ from strain 5  |
| $pTX_{\Delta} + gdpP$ (strain 6)  | Constitutively expressed $gdpP$ from strain 6  |
| $pTX_{\Delta} + gdpP$ (strain 7)  | Constitutively expressed $gdpP$ from strain 7  |
| $pTX_{\Delta} + gdpP$ (strain 8)  | Constitutively expressed $gdpP$ from strain 8  |
| $pTX_{\Delta} + gdpP$ (strain 9)  | Constitutively expressed $gdpP$ from strain 9  |
| $pTX_{\Delta} + gdpP$ (strain 10) | Constitutively expressed $gdpP$ from strain 10 |
| $pTX_{\Delta} + gdpP$ (strain 11) | Constitutively expressed $gdpP$ from strain 11 |
| $pTX_{\Delta} + gdpP$ (strain 12) | Constitutively expressed $gdpP$ from strain 12 |
| pKOR1                             | pKOR1 deletion construct for $gdpP$ gene (6)   |
| pLL29                             | Chromosomal integrative plasmid (7)            |

123 **Table S3: List of primers used in this study**

| <b>Primer</b> | <b>Sequence (5'-3')</b>                                                                       |
|---------------|-----------------------------------------------------------------------------------------------|
| gdpP-P1       | GGGGACAAGTTTGTACAAAAAAGCAGGCTTGTTAATTTTCATT<br>AAAGAGGTAAATAATAGCTATAGTTAAAAATATGG            |
| gdpP-P2       | TATTCCACCTCTATTCACCTTTTGTAGAATTATTTTTCATGATTTCG<br>AAGTGAATAGAGGTGGAATAATGAAAGTAATTTTACACAAGA |
| gdpP-P3       | TGTTAAAGGTAAAGGTAAAAAAGG<br>GGGGACCACTTTGTACAAGAAAGCTGGGTCTTCAGCTGTTTC                        |
| gdpP-P4       | ATACACTTGTCCCTAAGACGTCTCGAATGTCTTTAAAGC<br>AAAGGATCCTAAAAAGTGAATAGAGGTGGAATAATG               |
| gdpP-1        | ACTAATGACACGTGTTACCATTGAGTTGATTTC                                                             |
| gdpP-2        | ATGGTAACACGTGTCATTAGTCGATGGGCAACTG                                                            |
| gdpP-3        | TCGTTTCATCACACGTCGTAATGTTGGATCAATG                                                            |
| gdpP-4        | AACATTACGACGTGTGATGAACGAAATAGATAAAAAGC                                                        |
| gdpP-5        | TAAACGCGTCTTTCATGCATCTTCACTCCTACTTAATTG                                                       |
| gdpP-6        | ACGTTTAACGCGACTTGAATCAACAGTGATGTATG                                                           |
| gdpP-7        | TGTTGATTCAAGTCGCGTTAAACGTTGTTCTG                                                              |
| gdpP-8        | ATGGTAACACGTGTCATTAGTCGATGGTCAACTGAG                                                          |
| gdpP-9        | AACATTACGACGTGTGATGAACGAAATTGATAAAAAGTC                                                       |
| gdpP-10       |                                                                                               |

125 **Table S4: List of the clinical isolates used for measurement of CDA abundance, and their**  
 126 **associated *gdpP* mutations in comparison to GdpP of SF8300 (USA300HOU\_0014). (8)**

127

| Strains | Corresponding strain annotation as<br>per Argudín <i>et al</i> (8) | <i>gdpP</i> associated<br>mutations |
|---------|--------------------------------------------------------------------|-------------------------------------|
| 1       | 004                                                                | V496E                               |
| 2       | 007                                                                | F54L                                |
| 3       | 009                                                                | P312L                               |
| 4       | 013                                                                | D105N, P392S, A601E                 |
| 5       | 019                                                                | A210S                               |
| 6       | 021                                                                | Q642X                               |
| 7       | 022                                                                | R504X                               |
| 8       | 024                                                                | D105N, P392S, V496X                 |
| 9       | 025                                                                | E486K                               |
| 10      | 027                                                                | V609D                               |
| 11      | 028                                                                | T317I                               |
| 12      | 032                                                                | I263N                               |

128

129 **Table S5: Mutations in *gdpP* and *pbp4* among SRT passaged cultures**

| <b>Passaged stocks</b> | <b>Ceftaroline concentration (µg/ml)</b> | <b><i>gdpP</i></b> | <b><i>Ppbp4+pbp4</i></b> |
|------------------------|------------------------------------------|--------------------|--------------------------|
| Day 3 clone 1          | 0.25                                     | X515               | -                        |
| Day 3 clone 2          | 0.25                                     | X402               | -                        |
| Day 3 clone 3          | 0.25                                     | X238               | -                        |
| Day 4 clone 1          | 0.5                                      | X306               | -                        |
| Day 4 clone 2          | 0.5                                      | X306               | -                        |
| Day 4 clone 3          | 0.5                                      | X306               | -                        |

130 X = missense mutation

131 **Table S6: MIC ( $\mu\text{g/ml}$ ) of  $\beta$ -lactam drugs**

| <b>Strains</b>        | <b>NAF</b> | <b>CTX</b> | <b>FOX</b> | <b>CFZ</b> | <b>CPT</b> |
|-----------------------|------------|------------|------------|------------|------------|
| MW2                   | 16         | 64         | 32         | 64         | 0.5        |
| MW2 $\Delta gdpP$     | 32         | > 256      | 64         | 128        | 1          |
| SF8300                | 16         | 128        | 16         | 16         | 0.5        |
| SF8300 <sup>tet</sup> | 16         | 128        | 16         | 8          | 0.5        |

132 NAF- nafcillin; CTX- ceftriaxone; FOX- ceftioxin; CFZ- cefazoline; CPT- ceftaroline

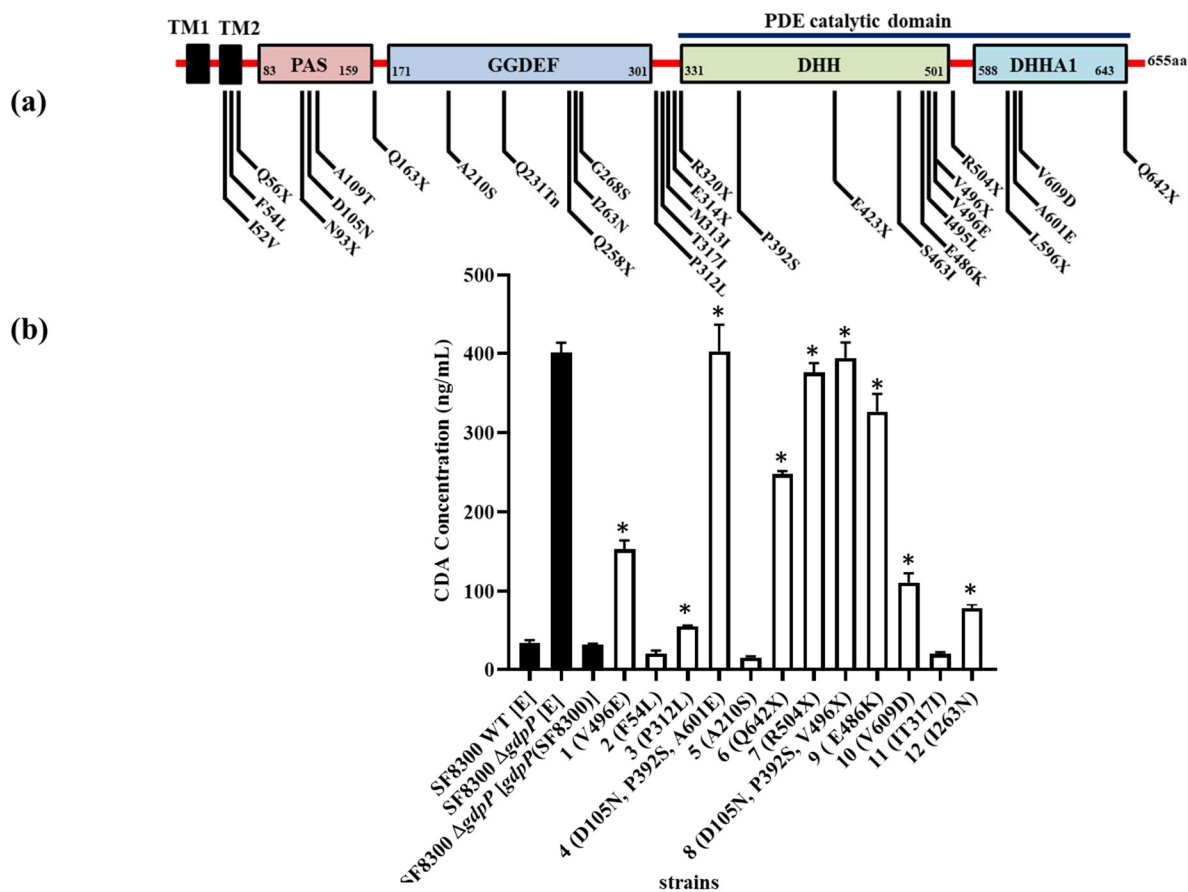

133

134 **Figure S1: Clinical strains of *S. aureus* containing *gdpP* associated mutations.**

135 **(a)** Schematic diagram showing all different domains of GdpP and mutations detected among  
 136 clinical isolates.

137 **(b)** Analysis of CDA levels of SF3000  $\Delta$ *gdpP* cells containing *gdpP* from clinically isolated  
 138 strains. Only *gdpP* with missense mutation/s (see Table S4) of clinical strains were analyzed. The  
 139 X-axis contains the clinical strains (strains 1 through 12) having different mutations associated in  
 140 the *gdpP* gene. The Y-axis is the CDA concentration. Strains having an asterisk had significantly  
 141 higher concentrations of CDA compared to SF8300 WT [E]. P value for these strains < 0.05. [E]  
 142 represents complementation with an empty vector.

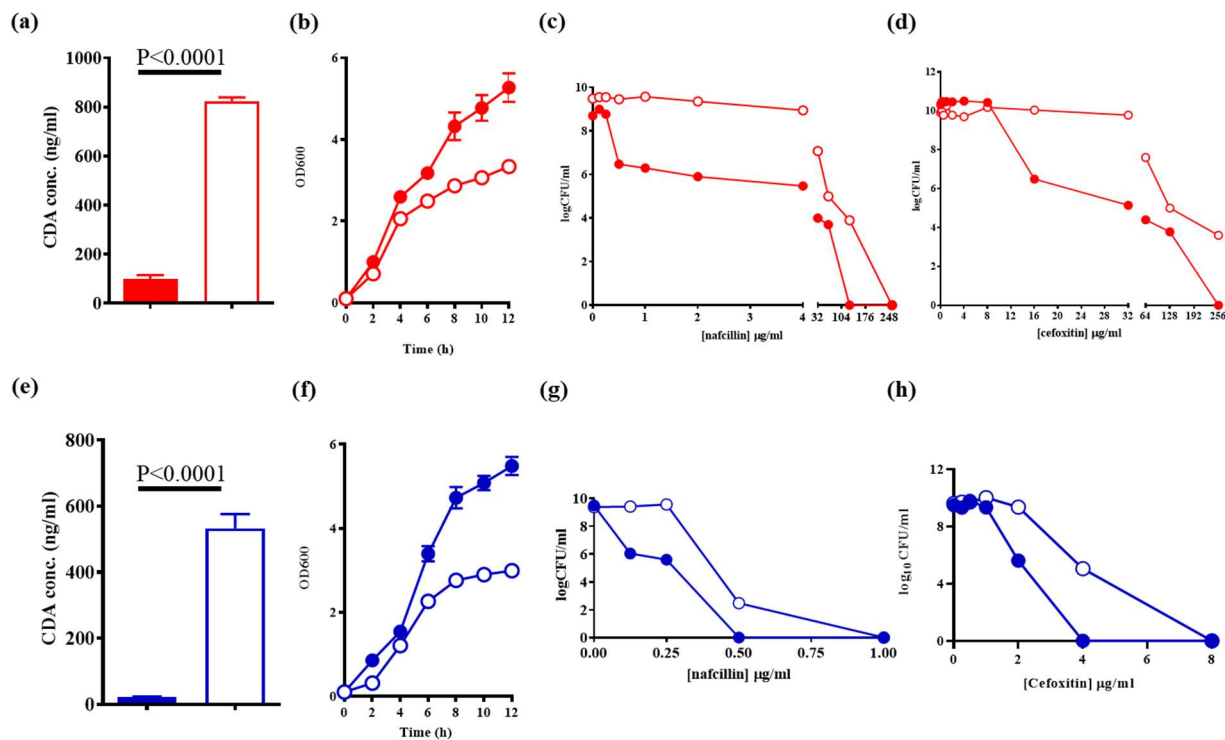

143

#### 144 **Figure S2: GdpP phenotypes are not dependent on *mecA*.**

145 **(a) & (e)** CDA concentrations in the cytosol of SF8300 (closed red) and SF8300ex (closed blue)  
 146 and their isogenic  $\Delta gdpP$  (open symbols) strains respectively.

147 **(b) & (f)** Growth curve of SF8300 and SF8300ex wild-type strains (closed red and closed blue  
 148 circles, respectively) and their isogenic  $\Delta gdpP$  strains (open red and open blue circles,  
 149 respectively) in TSB media.

150 **(c) & (g)** Population analysis of SF8300 and SF8300ex wild-type strains (closed red and closed  
 151 blue circles, respectively) and their isogenic  $\Delta gdpP$  strains (open red and open blue circles,  
 152 respectively) in nafcillin.

153 **(d) & (h)** Population analysis of SF8300 and SF8300ex wild-type strains (closed red and closed  
154 blue circles, respectively) and their isogenic  $\Delta gdpP$  strains (open red and open blue circles,  
155 respectively) in cefoxitin.



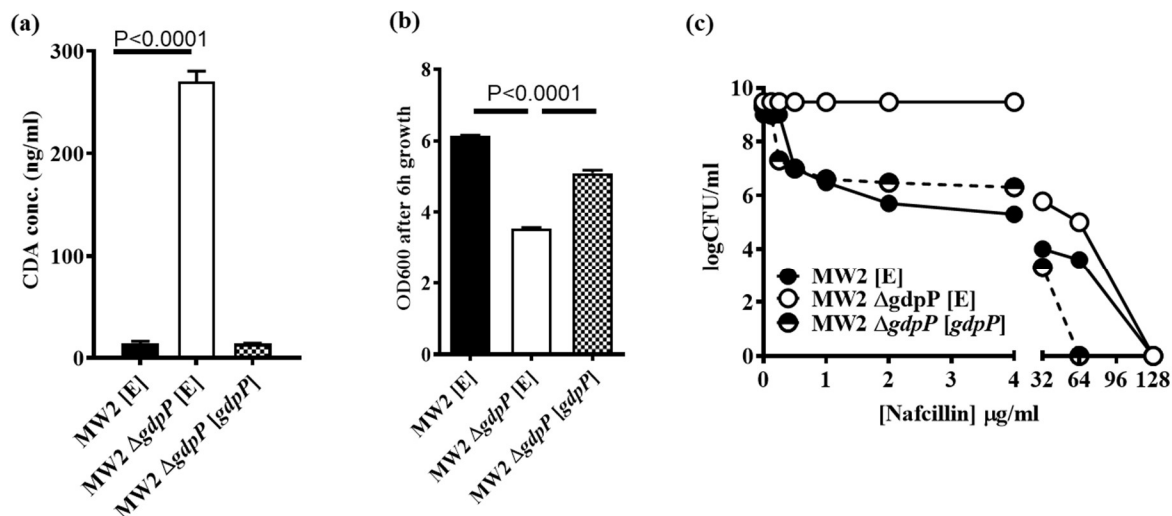

156

157 **Figure S3: Complementation with *gdpP* restored wild-type phenotypes in MW2 strains.**

158 **(a)** CDA levels in the cytosol: Deletion of *gdpP* caused a significant increase in the cytosolic CDA  
 159 concentration (P value for wild-type (MW2 [E]) and deletion mutant (MW2  $\Delta gdpP$  [E])  $< 0.0001$ )

160 **(b)** Growth pattern in TSB media: The deletion of *gdpP* in MW2  $\Delta gdpP$  [E] caused a growth  
 161 defect when compared to the wild-type strain containing an empty vector, MW2 [E]. This growth  
 162 defect was abolished when complemented with wild-type *gdpP* in strain MW2  $\Delta gdpP$  [*gdpP*].

163 **(c)** Population analysis with nafcillin: The deletion of *gdpP* in strain MW2  $\Delta gdpP$  [E] (open  
 164 circles) enabled the cells to survive a nafcillin challenge, when compared to wild-type MW2 [E]  
 165 (completely filled circles) and the complemented strain MW2  $\Delta gdpP$  [*gdpP*] (half-filled circles).

166 [E] represents complementation with an empty vector.

167

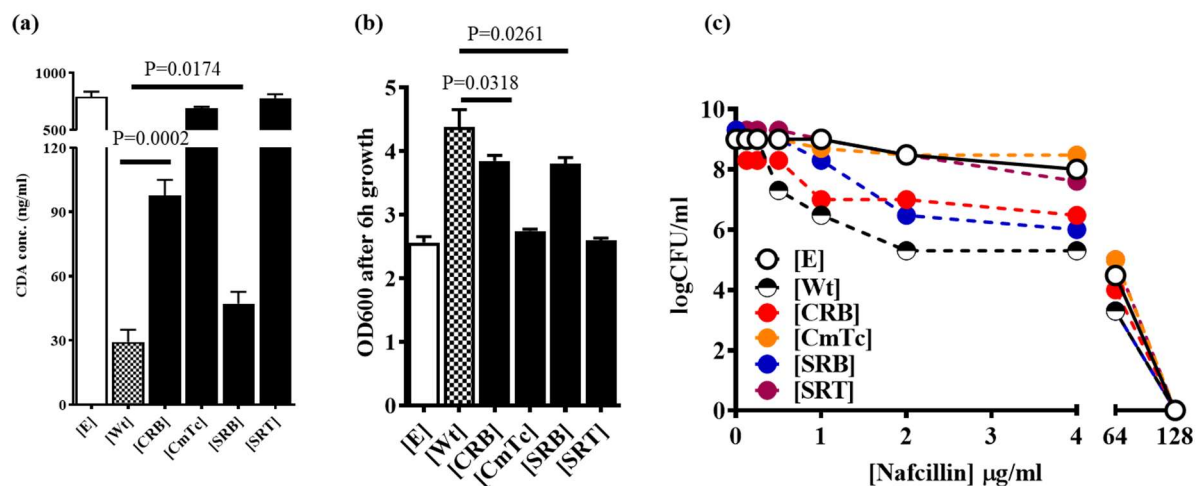

168

169 **Figure S4: CDA drives  $\Delta gdpP$  associated phenotypes.**

170 **(a)** Cytosolic measurements of CDA of SF8300  $\Delta gdpP$  strain complemented with either an empty  
 171 vector [E], wild-type *gdpP* and mutant *gdpP*s obtained from passaged strains showed that  
 172 complementation with *gdpP* from CRB, CmTc, SRB and SRT caused significantly increased  
 173 levels of CDA when compared to wild-type *gdpP*.

174 **(b)** Measurement of OD600 after 6 hours of bacterial culture in TSB showed that when SF8300  
 175  $\Delta gdpP$  was complemented with *gdpP* from strains such as CRB, CmTc, SRB and SRT, there was  
 176 a growth defect when compared to complementation with wild-type *gdpP*.

177 **(c)** Population analysis with nafcillin showed that when SF8300  $\Delta gdpP$  was complemented with  
 178 *gdpP* from strains such as CRB, CmTc, SRB and SRT, the cells had increased survival when  
 179 compared to when complemented with *gdpP*.

180 [E] represents complementation of SF8300  $\Delta gdpP$  with an empty vector.

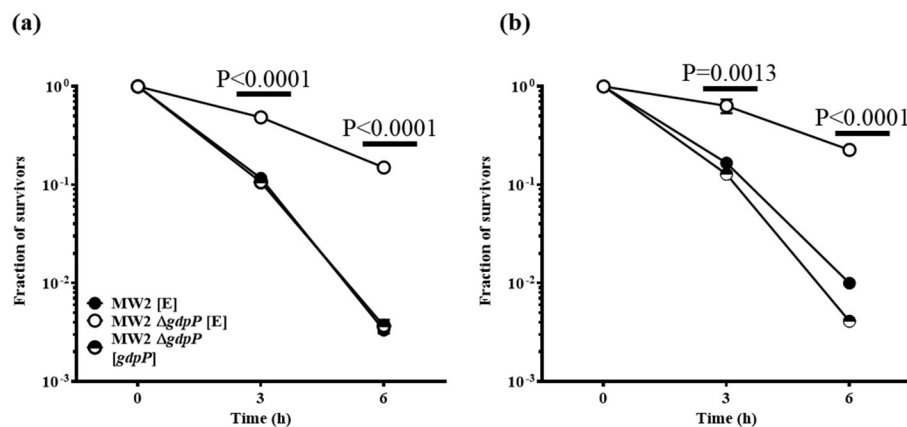

181

182 **Figure S5: Deletion of *gdpP* leads to  $\beta$ -lactam tolerance in MW2 strains.**

183  $\beta$ -lactam tolerance assay carried out in:

184 **(a)** nafcillin (128  $\mu\text{g/ml}$ )

185 **(b)** cefoxitin (128  $\mu\text{g/ml}$ )

186 Showed that in the strain MW2  $\Delta gdpP$  [E] (open circles) had a significant increase in the fraction  
 187 of survivors, and thus, in tolerance when compared to the an empty vector MW2 [E] (filled circles)  
 188 and a complemented strain MW2  $\Delta gdpP$  [gdpP] (half-filled circles). [E] refers to complementation  
 189 with an empty vector which serves as a control.

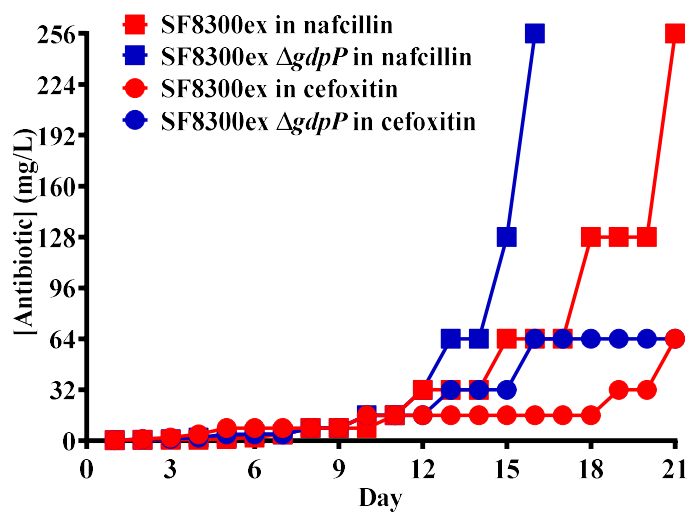

190

191 **Figure S6: Passaging of SF8300ex and its  $\Delta gdpP$  strains in nafcillin and cefoxitin.**

192 SF8300ex  $\Delta gdpP$  was able to develop resistance faster than SF8300ex Wt, when passaged in

193 nafcillin as well as in cefoxitin.

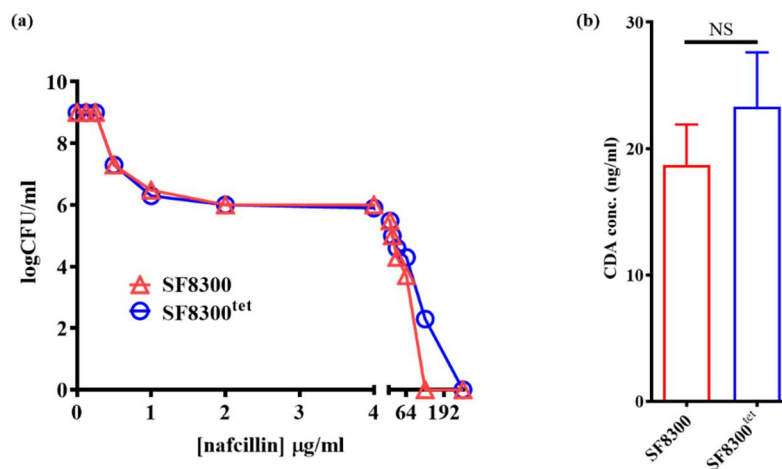

194

195 **Figure S7: Loss of *gdpP* function could lead to  $\beta$ -lactam treatment failure.**196 **(a)** Population analysis with nafcillin showed that there was no difference in  $\beta$ -lactam resistance  
197 phenotypes for SF8300 and the tetracycline resistant SF8300 strain, SF8300<sup>tet</sup>.198 **(b)** Measurement of CDA concentration in the bacterial cytosol showed that there was no  
199 significant difference in cytosolic CDA levels between SF8300 and the tetracycline resistant  
200 SF8300 strain, SF8300<sup>tet</sup>.

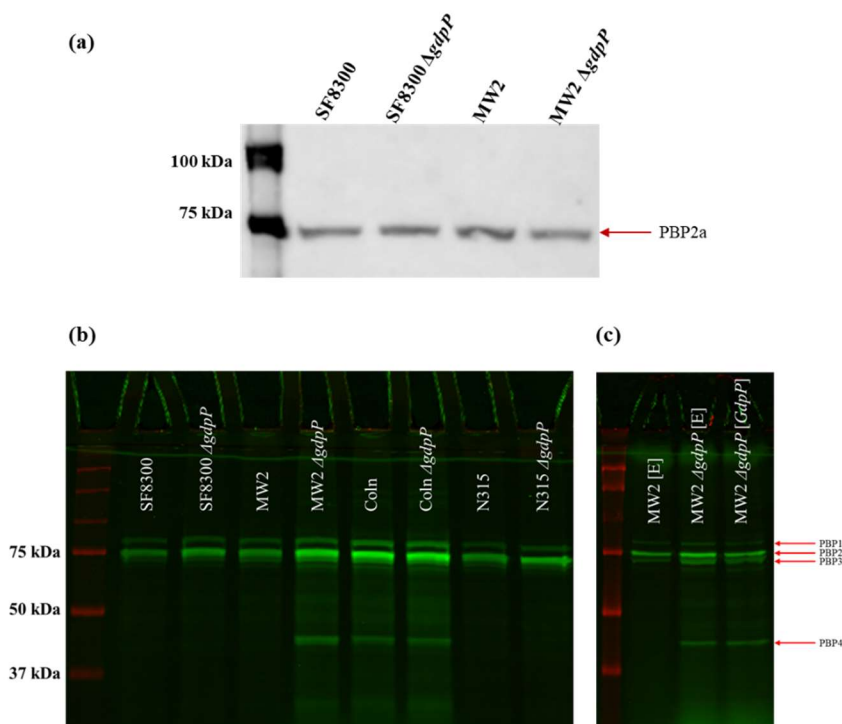

201

202 **Figure S8: Deletion of *gdpP* did not have an effect on the expression of PBPs.**

203 **(a)** Western blots of SF8300, MW2 and their isogenic  $\Delta gdpP$  strains showed that there was no  
 204 difference in the expression of PBP2a among the selected strains.

205 **(b)** Bocillin assay showing PBPs in SF8300, MW2, COLn, N315 and their isogenic  $\Delta gdpP$  strains  
 206 showed that there was no difference in the expression of Penicillin Binding Proteins 1-4 among  
 207 the Wt and  $\Delta gdpP$  strain pairs. **(c)** Bocillin assay showing PBPs in MW2, MW2  $\Delta gdpP$   
 208 complemented with an empty vector [E] and MW2  $\Delta gdpP$  complemented with *gdpP* suggested  
 209 that the difference in expression of PBP4 in MW2 and MW2  $\Delta gdpP$  was potentially due to a  
 210 secondary site mutation and not due to the deletion of *gdpP*, as the complementation of *gdpP* did  
 211 not cause any alterations on PBP4 levels.

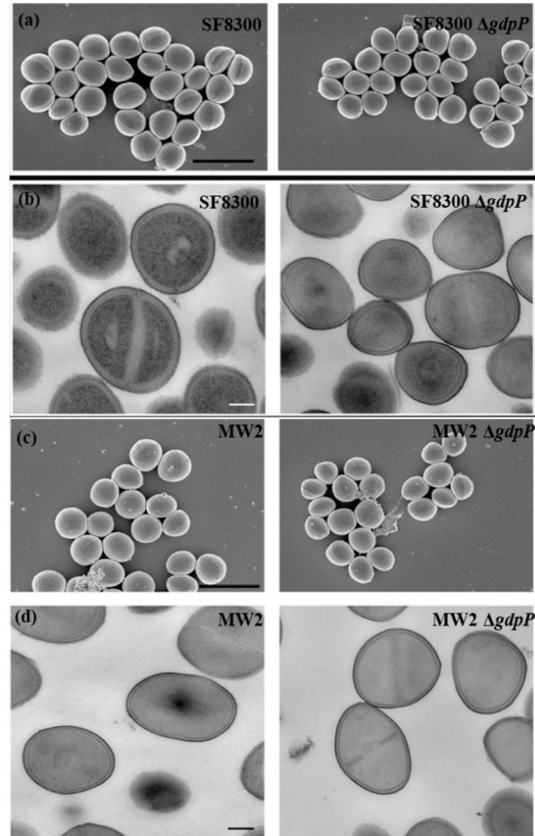

212

213 **Figure S9 (a) to (d): Transmission electron microscopic (TEM) and Scanning electron**  
214 **microscopic (SEM) images of SF8300, MW2 and their isogenic  $\Delta gdpP$  strains showed that**  
215 **there was no apparent difference in cell morphologies between Wt and  $\Delta gdpP$  strain pairs.**
